# Supplementary material
Source: PubMed Central journal article supplement (PMC2629349)
Supplement: 0806360105_0806360105SI.pdf [file 0806360105_0806360105SI.pdf]

# Supporting Information

Tümpel *et al.* 10.1073/pnas.0806360105

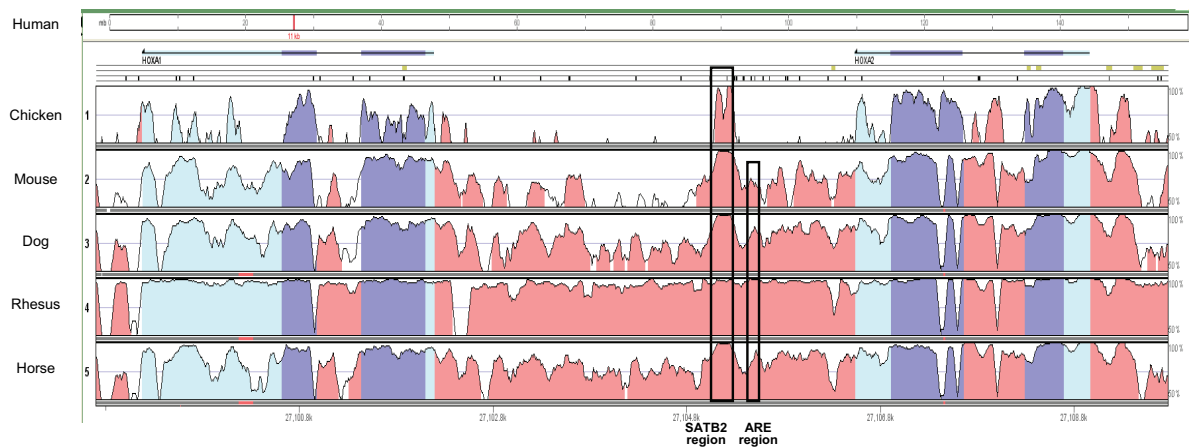

**Fig. S1.** Vista plot comparing Chicken with Mammalian Hoxa1-Hoxa2 and intergenic regions. The GenomeVista program (<http://pipeline.lbl.gov/cgi-bin/GenomeVista>) was used. The search was performed starting with Chicken contig AC163712.3, then the viewed region was focused around HoxA1-A2 (base Human March 2006 Chr7:27,098,666–27,109,735). RefSeq Gene annotation was used and the parameters were edited (vs. Chicken, 50, 50, 60, no change to the others). The default chicken view (which is blank in this region) and rat sequences were removed for clarity. The ARE (described in Fig. 1A, Fig. S2, and the main text) is located in position 27,098,457–67 in the Human March 2006 release. Global alignments were performed using GenomeVISTA (refs. 1 and 2 and <http://genome.lbl.gov/vista/index.shtml>).

1. Bray N, Dubchak I, Pachter L (2003) AVID: A global alignment program. *Genome Res* 13:97–102.
2. Couronne O, *et al.* (2003) Strategies and tools for whole-genome alignments. *Genome Res* 13:73–80.



**Table S1. Primers used to construct indicated constructs in Fig. 1**

| Construct                             | Sequence                                                     |                                                              |
|---------------------------------------|--------------------------------------------------------------|--------------------------------------------------------------|
|                                       | Forward                                                      | Reverse                                                      |
| 3                                     | ACG CGT TTC AGC AGA ATG CG                                   | GCA GGA CCC TGG GAG AGG AC                                   |
| 4                                     | ACG CGT TTC AGC AGA ATG CG                                   | AAA AAG TCA AAG CTG TCA GC                                   |
| Dog r2 enhancer                       | GAA ATT TAA AAG CCT CGA AGA CTC                              | TGC TTT GTT TTG CTT TAA TGT TTT                              |
| Mouse r2 enhancer                     | <u>GCT TCT AGA</u> GAA ATT TAA AAA CCT GGA GGA C             | <u>AGC TCT AGA</u> TTG TTT TTC AGG AAA ATC AC                |
| zebrafish r2 enhancer                 | GAA AGA GAG GGT TAT CCA TT                                   | GTT GGC TAT TTC TTT ATC CG                                   |
| <i>Xenopus tropicalis</i> r2 enhancer | CTT GAA TAG TGT CTC TGG GG                                   | CAA ATA CTC ATT TAT TCT ACC A                                |
| Medaka                                | ATC GAC TTC CAG CAG GCT GC                                   | CCA AAG CCG AGT CAT TGT TC                                   |
| 7                                     | <u>GCT TCT AGA</u> CAA TGG CGA ATC CCA AAG TT                | <u>TCG CCG CGG CTG AAG CTT</u> CTG CAG GCA GGA<br>ATC TGT GG |
| 8                                     | <u>ATA AGA ATG CGG CCG</u> CCC GTT TCG CCT TTA<br>ACG AGC    | <u>TCG CCG CGG CTG AAG CTT</u> CTG CAG GCA GGA<br>ATC TGT GG |
| 9                                     | <u>GCT TCT AGA</u> AAA ATC TGA AAC ATT TTC AA                | <u>TCG CCG CGG CTG AAG CTT</u> CTG CAG GCA GGA<br>ATC TGT GG |
| 10                                    | <u>ATA AGA ATG CGG CCG</u> CAC ACC AGT CAC CCA<br>CTG TTC A  | <u>TCG CCG CGG CTG AAG CTT</u> CTG CAG GCA GGA<br>ATC TGT GG |
| 11                                    | <u>GCT TCT AGA</u> TCA ACA ATG GCC CAG AAC TG                | <u>TCG CCG CGG CTG AAG CTT</u> CTG CAG GCA GGA<br>ATC TGT GG |
| 12                                    | <u>GCT TCT AGA</u> GAC AAG CTT ACG CGT TTC AGC<br>AGA ATG CG | <u>TCG CCG CGG</u> CTC AGG ACT GTC ATT GTT GA                |
| 13                                    | <u>GCT TCT AGA</u> GAC AAG CTT ACG CGT TTC AGC<br>AGA ATG CG | <u>TCG CCG CGG</u> AGA GGC AGT TTT GAA CAG TG                |
| 14                                    | <u>GCT TCT AGA</u> GAC AAG CTT ACG CGT TTC AGC<br>AGA ATG CG | <u>TCG CCG CGG</u> TTC TCA TTG CTC GTT AAA GG                |

Underlined sequences are linkers added to provide convenient restriction enzyme sites for cloning purposes.

**Table S2. Primers used to create deletions in Fig. 2**

| Construct | Sequence                                                                                      |
|-----------|-----------------------------------------------------------------------------------------------|
| Δ 1       | GCT CTC GCA GCA GCA GGC GCA GAA TGC GCC CCA AAG TTT CCC CGT TTC GCC TTT AAC G                 |
| Δ 2       | GGC GCA GAA TGC GCA CAA TGG CGA ATC CCC GTT TCG CCT TTA ACG AGC AAT G                         |
| Δ 2.1     | GGC GCA GAA TGC GCA CAA TGG CGA ATA GTT TCC CCG TTT CGC CTT TAA CGA GCA ATG                   |
| Δ 2.2     | GGC GCA GAA TGC GCA CAA TGG CGA ATC CCA ACC CCG TTT CGC CTT TAA CGA GCA ATG                   |
| Δ 3       | GCA GAA TGC GCA CAA TGG CGA ATC CCA AAG TTT CCT TTA ACG AGC AAT GAG AAA AAT CTG AAA           |
| Δ 4       | CGA ATC CCA AAG TTT CCC CGT TTC GGC AAT GAG AAA AAT CTG AAA CAT TTT CAA CAC C                 |
| Δ 4.1     | CGA ATC CCA AAG TTT CCC CGT TTC GCC AAC GAG CAA TGA GAA AAA TCT GAA ACA TTT TCA ACA CC        |
| Δ 4.2     | CGA ATC CCA AAG TTT CCC CGT TTC GCC TTT GCA ATG AGA AAA ATC TGA AAC ATT TTC A                 |
| Δ 5       | CCC AAA GTT TCC CCG TTT CGC CTT TAA CGA AAA TCT GAA ACA TTT TCA ACA CCA GTC ACC               |
| Δ 5.1     | CCC AAA GTT TCC CCG TTT CGC CTT TAA CGA GAG AAA AAT CTG AAA CAT TTT CAA CAC CAG TCA CC        |
| Δ 5.2     | CCC AAA GTT TCC CCG TTT CGC CTT TAA CGA GCA ATA AAT CTG AAA CAT TTT CAA CAC CAG TCA CC        |
| Δ 6       | CCC CGT TTC GCC TTT AAC GAG CAA TGA GAC ACC AGT CAC CCA CTG TTC AAA ACT GCC TCT CAA CAA TGG C |
| Δ 7       | GCA ATG AGA AAA ATC TGA AAC ATT TTC AAA AAC TGC CTC TCA ACA ATG GCC CAG AAC TGC GC            |
| Δ 8       | CAT TTT CAA CAC CAG TCA CCC ACT GTT CAC CCA GAA CTG CGC AGC TGG CCT CAA CAA TGA CAG           |
| Δ 8.1     | GAA ACA TTT TCA ACA CCA GTC ACC CAC TGT TCA TCA ACA ATG GCC CAG AAC TGC GCA GCT GGC           |
| Δ 8.2     | CCA GTC ACC CAC TGT TCA AAA CTG CCT CCC CAG AAC TGC GCA GCT GGC CTC AAC AAT GAC AGT CC        |
| 9         | CCA CTG TTC AAA ACT GCC TCT CAA CAA TGG CTC AAC AAT GAC AGT CCT GAG GCC CTC GAG G             |
| Δ 10      | CCT CTC AAC AAT GGC CCA GAA CTG CGC AGC TGG CGG CCC TCG AGG TCC CCT CTT TAC AGG               |
| Δ 10.1    | CCT CTC AAC AAT GGC CCA GAA CTG CGC AGC TGG CAC AGT CCT GAG GCC CTC GAG GTC CCC TCT TTA CAG G |
| Δ 10.2    | GCC CAG AAC TGC GCA GCT GGC CTC AAC AAT GGG CCC TCG AGG TCC CCT CTT TAC AGG ACT TTA ACG       |
| Δ 11      | GCG CAG CTG GCC TCA ACA ATG ACA GTC CTG ATA CAG GAC TTT AAC GTT TTC TCC ACA GAT TCC TGC       |

**Table S3. Primers used in Fig. 3 constructs.**

| Construct | Primer                                                                                                                                    |                                                                                                                                   |
|-----------|-------------------------------------------------------------------------------------------------------------------------------------------|-----------------------------------------------------------------------------------------------------------------------------------|
|           | Forward                                                                                                                                   | Annealing                                                                                                                         |
| 36        | GGC CGC AAG CTT AAA CTG CCT CTC AAC AAT GGA AAC<br>TGC CTC TCA ACA ATG GAA ACT GCC TCT CAA CAA TGG<br>AAA CTG CCT CTC AAC AAT GGT CCC CGC | GGG GAC CAT TGT TGA GAG GCA GTT TCC ATT GTT GAG<br>AGG CAG TTT CCA TTG AGA GGC AGT TTC CAT TGT TGA<br>GAG GCA GTT TAA GCT TGC     |
| 37        | GGC CGC AAG CTT CTC AAC AAT GAC AGT CCT GAC TCA<br>ACA ATG ACA GTC CTG ACT CAA CAA TGA CAG TCC TGA<br>CTC AAC AAT GAC AGT CCT GAT CCC CGC | GGG GAT CAG GAC TGT CAT TGT TGA GTC AGG ACT GTC<br>ATT GTT GAG TCA GGA CTG TCA TTG TTG AGT CAG GAC<br>TGT CAT TGT TGA GAA GCT TGC |
| 38        | CTG GAA AGC TTC TCA ACA ATG ACC TCA ACA ATG ACC<br>TCA ACA ATG ACC TCA ACA ATG ACC CGC                                                    | GGG TCA TTG TTG AGG TCA TTG TTG AGG TCA TTG TTG<br>AGG TCA TTG TTG AGA AGC TTT                                                    |
| 39        | CTA GAA AGC TTA CAA TAC AAT ACA ATA CAA TCC GC                                                                                            | GGA TTG TAT TGT ATT GTA TTG TAA GCT TT                                                                                            |

The annealed primers were inserted directly into BGZ40 digested with XbaI and SacI.

**Table S4. Primers used to construct mutations summarized in Fig. 4B**

| Construct          | Primer                                                                                      |
|--------------------|---------------------------------------------------------------------------------------------|
| Δ 1 TCC to TCG     | GCA GCA GGC GCA GAA TGC GCA CAA TGG CGA ATC GCA AAG TTT CCC CGT TTC GCC TTT AAC GAG C       |
| Δ 1 TCC to TCT     | GCA GCA GGC GCA GAA TGC GCA CAA TGG CGA ATC TCA AAG TTT CCC CGT TTC GCC TTT AAC GAG C       |
| Δ 1 TCC to TCA     | GCA GCA GGC GCA GAA TGC GCA CAA TGG CGA ATC ACA AAG TTT CCC CGT TTC GCC TTT AAC GAG C       |
| Δ 1 CAA to CAG     | GCA GCA GGC GCA GAA TGC GCA CAA TGG CGA ATC CCA GAG TTT CCC CGT TTC GCC TTT AAC GAG C       |
| Δ 2 CCT to CCG     | CGA ATC CCA AAG TTT CCC CGT TTC GCC GTT AAC GAG CAA TGA GAA AAA TCT GAA ACA TTT TCA ACA CC  |
| Δ 2 CCT to CCA     | CGA ATC CCA AAG TTT CCC CGT TTC GCC ATT AAC GAG CAA TGA GAA AAA TCT GAA ACA TTT TCA ACA CC  |
| Δ 2 CCT to CCC     | CGA ATC CCA AAG TTT CCC CGT TTC GCC CTT AAC GAG CAA TGA GAA AAA TCT GAA ACA TTT TCA ACA CC  |
| Δ 2 TTA to TTG     | CGA ATC CCA AAG TTT CCC CGT TTC GCC TTT AAC GAG CAA TGA GAA AAA TCT GAA ACA TTT TCA ACA CC  |
| Δ 2 ACG to ACA     | CGA ATC CCA AAG TTT CCC CGT TTC GCC TTT AAC AAG CAA TGA GAA AAA TCT GAA ACA TTT TCA ACA CC  |
| Δ 2 ACG to ACT     | CGA ATC CCA AAG TTT CCC CGT TTC GCC TTT AAC TAG CAA TGA GAA AAA TCT GAA ACA TTT TCA ACA CC  |
| Δ 2 ACG to ACC     | CGA ATC CCA AAG TTT CCC CGT TTC GCC TTT AAC CAG CAA TGA GAA AAA TCT GAA ACA TTT TCA ACA CC  |
| Δ 3 GAG to GAA     | CCA AAG TTT CCC CGT TTC GCC TTT AAC GAG CAA TGA AAA AAA TCT GAA ACA TTT TCA ACA CCA GTC ACC |
| Δ 3 AAA to AAG     | CCA AAG TTT CCC CGT TTC GCC TTT AAC GAG CAA TGA GAA GAA TCT GAA ACA TTT TCA ACA CCA GTC ACC |
| Δ 8 TCA to TCC     | CCC ACT GTT CAA AAC TGC CTC TCC ACA ATG GCC CAG AAC TGC                                     |
| Δ 8 TCA to TCT     | CCC ACT GTT CAA AAC TGC CTC TCT ACA ATG GCC CAG AAC TGC                                     |
| Δ 8 TCA to TCG     | CCC ACT GTT CAA AAC TGC CTC TCG ACA ATG GCC CAG AAC TGC                                     |
| Δ 8 ACA to ACC     | CCC ACT GTT CAA AAC TGC CTC TCA ACC ATG GCC CAG AAC TGC                                     |
| Δ 8 ACA to ACG     | CCC ACT GTT CAA AAC TGC CTC TCA ACG ATG GCC CAG AAC TGC                                     |
| Δ 8 ACA to ACT     | CCC ACT GTT CAA AAC TGC CTC TCA ACT ATG GCC CAG AAC TGC                                     |
| Δ 8 ACAAT to AAAAT | CCC ACT GTT CAA AAC TGC CTC TCA AAA ATG GCC CAG AAC TGC                                     |
| Δ 8 ACAAT to ACAAA | CCC ACT GTT CAA AAC TGC CTC TCA ACA AAG GCC CAG AAC TGC                                     |
| Δ 8 ACAAT to ACAAG | CCC ACT GTT CAA AAC TGC CTC TCA ACA AGG GCC CAG AAC TGC                                     |
| Δ 8 ACAAT to ACAGT | CCC ACT GTT CAA AAC TGC CTC TCA ACA GTG GCC CAG AAC TGC                                     |
| Δ 8 ACAAT to AGAAT | CCC ACT GTT CAA AAC TGC CTC TCA AGA ATG GCC CAG AAC TGC                                     |
| Δ 8 ACAAT to GCAAT | CCC ACT GTT CAA AAC TGC CTC TCA GCA ATG GCC CAG AAC TGC                                     |
| Δ 8 CTCAA to CTTAA | CCC ACT GTT CAA AAC TGC CTC TTA ACA ATG GCC CAG AAC TGC                                     |
| Δ 8 CTCAA to CGCAA | CCC ACT GTT CAA AAC TGC CTC GCA ACA ATG GCC CAG AAC TGC                                     |
| Δ 8 TGGC to TCGC   | CCC ACT GTT CAA AAC TGC CTC TCA ACA ATC GCC CAG AAC TGC                                     |
| Δ 8 TGGC to TGTC   | CCC ACT GTT CAA AAC TGC CTC TCA ACA ATG TC                                                  |
| Δ 10 AAC to AAT    | GGC CCA GAA CTG CGC AGC TGG CCT CAA TAA TGA CAG TCC TGA GGC CCT CGA GG,                     |
| Δ 10 AAT to AAC    | GGC CCA GAA CTG CGC AGC TGG CCT CAA TAA CGA CAG TCC TGA GGC CCT CGA GG                      |

Δ 1, mutations in RTE1; Δ 2, mutations in RTE2. Δ 3, mutations in RTE3; Δ 8, mutations in ACAAT-1; Δ 10, mutations in ACAAT-2.

**Table S5. Oligos used in Fig. 4A**

| Oligo name    | Forward oligo sequence for EMSA          |
|---------------|------------------------------------------|
| ACAAT-1 probe | CTG CCT CTC AAC AAT GGC CCA GAA C        |
| 1-Mut-1       | CTG CCT CTC AAC <u>GAT</u> GGC CCA GAA C |
| 1-Mut-2       | CTG CCT CTC AAC <u>AA</u> GGC CCA GAA C  |
| 1-Mut-3       | CTG CCT CTC <u>AAT</u> AAT GGC CCA GAA C |
| 1-Mut-4       | CTG CCT CTC <u>GAC</u> AAT GGC CCA GAA C |
| ACAAT-2 probe | GCT GGC CTC AAC AAT GAC AGT CCT G        |
| 2-Mut-1       | GCT GGC CTC AAC <u>GAT</u> GAC AGT CCT G |
| 2-Mut-2       | GCT GGC CTC AAC <u>AAG</u> GAC AGT CCT G |
| 2-Mut-3       | GCT GGC CTC <u>AAT</u> AAT GAC AGT CCT G |
| 2-Mut-4       | GCT GGC CTC <u>GAC</u> AAT GAC AGT CCT G |
